# Supplementary material
Source: PubMed Central journal article supplement (PMC3985613)

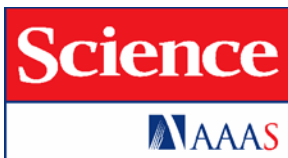

## Supplementary Materials for

### **An Inhibitor of Mutant IDH1 Delays Growth and Promotes Differentiation of Glioma Cells**

Dan Rohle, Janeta Popovici-Muller, Nicolaos Palaskas, Sevin Turcan, Christian Grommes, Carl Campos, Jennifer Tsoi, Owen Clark, Barbara Oldrini, Evangelia Komisopoulou, Kaiko Kunii, Alicia Pedraza, Stefanie Schalm, Lee Silverman, Alexandra Miller, Fang Wang, Hua Yang, Yue Chen, Andrew Kernytsky, Marc K. Rosenblum, Wei Liu, Scott A. Biller, Shinsan M. Su, Cameron W. Brennan, Timothy A. Chan, Thomas G. Graeber, Katharine E. Yen,\* Ingo K. Mellinghoff\*

\*Corresponding author.

E-mail: [katharine.yen@agios.com](mailto:katharine.yen@agios.com) (K.E.Y.); [mellingi@mskcc.org](mailto:mellingi@mskcc.org) (I.K.M.)

Published 4 April 2013 on *Science Express*

DOI: 10.1126/science.1236062

#### **This PDF file includes:**

Materials and Methods  
Supplementary Text  
Figs. S1 to S16  
Tables S1 and S2  
References

## Materials and Methods

Determination of compound inhibition potency against the R132H. This assay was used for both the HTS and subsequent IC<sub>50</sub> determinations to map the SAR of evolved compounds. In the primary reaction, the reduction of  $\alpha$ -KG acid to 2-HG is accompanied by a concomitant oxidation of NADPH to NADP. The amount of NADPH remaining at the end of the reaction time is measured in a secondary diaphorase/resazurin reaction in which the NADPH is consumed in a 1:1 molar ratio with the conversion of resazurin to the highly fluorescent resorufin. Uninhibited reactions exhibit a low fluorescence at the end of the assay, while reactions in which the consumption of NADPH by R132H IDH1 has been inhibited by a small molecule show a high fluorescence. The primary reaction was performed in a volume of 50  $\mu$ L 1X Buffer (150 mM NaCl, 20 mM Tris 7.5, 10 mM MgCl<sub>2</sub>, 0.05% (w/v) bovine serum albumin), contained 2 nM R132H IDH1, 1 mM alpha-ketoglutarate, and 4  $\mu$ M NADPH, and was conducted for sixty minutes at 25°C. To perform the secondary reaction, 25  $\mu$ L of 1X buffer containing 36  $\mu$ g/mL diaphorase and 30 mM resazurin was added to the primary reaction and incubated for a further 10 minutes at 25°C. Florescence was read on a Spectramax platereader at Ex 544 Em 590. Recombinant protein was expressed and purified as described in (1). Compounds or compound dilutions were prepared in 100% DMSO concentration and diluted 1:100 into the final reaction. R132C IDH1 was assayed under similar conditions, with the exception that the 1X Buffer was 50 mM K<sub>2</sub>HPO<sub>4</sub>, pH 6.5; 40 mM NaHCO<sub>3</sub>; 5 mM MgCl<sub>2</sub>; 10% glycerol; 0.03% (w/v) bovine serum albumin.

Assay of the IDH1 wild-type enzyme reaction for determination of inhibitor potency to this non-targeted version of the enzyme. IDH1 wild-type enzyme was assayed in a modified version of the assay used for R132H IDH1. Since this enzyme converts NADP to NADPH stoichiometrically with the conversion of isocitrate to alpha-ketoglutarate, NADPH product can be continuously assayed by direct coupling to the diaphorase/resazurin system and reading resorufin production at Ex 544 Em 590. Assays were conducted in 50  $\mu$ L of 1X Buffer (150 mM NaCl; 20 mM Tris, pH 7.5; 10 mM MgCl<sub>2</sub>; 0.05% (w/v) BSA; 2 mM B-ME) containing 50  $\mu$ M NADP, 70  $\mu$ M DL-isocitrate and 31.2 ng/mL IDH1wt enzyme. The direct coupling system was comprised of 20  $\mu$ g/ml diaphorase and 40  $\mu$ M resazurin.

Assay of the IDH2 R140Q and IDH2 R172K enzyme reaction for determination of inhibitor potency. Inhibitory potency against the IDH2 R140Q and IDH2 R172K enzymes was determined in an endpoint assay in which the amount of NADPH remaining at the end of the reaction was measured by the addition of a large excess of diaphorase and resazurin. IDH2 R140Q was diluted to 0.25  $\mu$ g/mL in 40  $\mu$ L 1X Assay Buffer (150 mM NaCl, 50 mM potassium phosphate pH 7.5, 10 mM MgCl<sub>2</sub>, 10% glycerol, 2 mM B-ME, 0.03% BSA) and incubated for 16 hours at 25°C in the presence of 1  $\mu$ L of compound in DMSO. The reaction was started with the addition of 10  $\mu$ L of Substrate Mix (20  $\mu$ M NADPH, 8  $\mu$ M alpha-ketoglutarate, in 1X Assay Buffer) and incubated for 1 hour at 25°C. Then, remaining NADPH was measured by the addition of 25  $\mu$ L of Detection Mix (36  $\mu$ g/mL diaphorase, 18  $\mu$ M resazurin in 1X Assay Buffer), incubated for 5 minutes at 25°C, and read as described above. IDH2 R172K was assayed as for IDH2 R140Q with the following modifications: 1.25  $\mu$ g/mL of protein was used, the Substrate Mix contained 50  $\mu$ M NADPH and 6.4  $\mu$ M alpha-ketoglutarate, and the compound was incubated for 1 hour before starting the reaction.

Assay of the IDH2 wild-type enzyme reaction for determination of inhibitor potency to this non-targeted family member of the enzyme. Inhibitory potency of compounds against the IDH2 WT enzyme was determined in a coupled assay to diaphorase. In this assay, production of NADPH by IDH2 WT was linked to a concomitant reduction of resazurin to the highly fluorescent resorufin. Enzyme was diluted to 0.06 µg/mL in 40 µL 1X Assay Buffer (150 mM NaCl, 50 mM potassium phosphate pH 7, 10 mM MgCl<sub>2</sub>, 10% glycerol, 2 mM B-ME, 0.03% BSA), to which 1 µL of compound was added in DMSO. The mixture was incubated for 1 hour at room temperature. The reaction was started with the addition of 10 µL of Substrate Mix (200 µM isocitrate, 175 µM NADP, 60 µg/ml diaphorase, 200 µM resazurin, in 1X Assay Buffer), and run for 30 minutes at room temperature. The reaction was halted with the addition of 25 µL of 6% SDS and read on a Spectramax Plate Reader at Ex544/Em590.

Glioma Cell Lines. TS603, TS676, and TS516 glioma cells were derived from glioma patients who underwent tumor resection at Memorial Sloan-Kettering Cancer Center (MSKCC). All human samples were collected after patients signed informed consent according to MSKCC IRB-guidelines. HT1080 cells were obtained from ATCC. Ink4a/Arf <sup>-/-</sup> neuroprogenitor cells (NPCs) were derived as previously described (2).

Generation of sublines with inducible IDH1 knockdown. TS603 cells and HT1080 cells were infected with lentiviral particles containing either pTRIPz empty vector (OpenBiosystems), pTRIPz IDH1 sh484 (targeting the CDS), or pTRIPz IDH1 sh1894 (targeting the 3'-UTR). To produce lentiviral particles, 293T cells were co-transfected with pTRIPz vectors, psPAX2 (Addgene #12260), and pMD2.G (Addgene #12259) and supernatant containing viral particles was collected at 36 and 72 hours.

Generation of lines with R132H-IDH1 overexpression. Immortalized Normal Human Astrocytes (NHAs) and Ink4a/Arf <sup>-/-</sup> neurospheres were infected with retroviral particles containing pQCXIH (Clontech #631516) or pQCXIH R132H-IDH1. NHAs were a kind gift from Russ Pieper (University of California, San Francisco.) Ink4a/ARF<sup>-/-</sup> neuroprogenitor cells were isolated from the subventricular zone of mice 6 days after birth as previously described (2). To produce retroviral particles, GP2-293 cells were co-transfected with pQCXIH vectors and pVSV-G (Clontech #631512).

Soft Agar assays. Cells were seeded in triplicates at 150,000 cells/well in Neurocult media (Stem Cell Technologies) containing 0.4% Noble agar and growth factor supplements (20ng/mL EGF, 10ng/mL bFGF). Cells were plated between two layers of Neurocult media and growth factors containing 0.65% Nobel agar. Colonies were stained 4 weeks after plating with either crystal violet (0.005%) or thiazolyl blue tetrazolium bromide (Sigma, M5655) and quantified using imagine software (Oxford Optronix) and an image processing algorithm (Charm algorithm, Oxford Optronix).

In-vivo experiments. SCID mice were injected subcutaneously with 10<sup>6</sup> glioma cells, which were suspended in 100 µL of a 50:50 mixture of growth media and Matrigel (BD #356237). Once tumors had reached a measurable size, mice were randomized into the indicated treatment groups. All experiments followed Institutional Animal Care and Use Committee (IACUC)-approved procedures.

Immunohistochemistry and Image Analysis. Paraffin-embedded tumor xenografts were sectioned at a thickness of 5  $\mu\text{m}$ /slide. Antigen retrieval, immunohistochemical detection, and counter staining were performed using a Ventana Discovery Ultra autostainer (Ventana). Primary antibodies were diluted as indicated: cleaved caspase-3 (Cell Signaling, #9665) 1:1000, H3K9Me3 (Abcam, #8898) 1:300, and Ki67 (DAKO, #M7240) 1:100. To determine the percentage of immunohistochemical positive cells, we assessed the total number of positively stained nuclei $\times$ 100/total number of nuclei on hematoxylin counterstaining. Three separate regions were analyzed for each tumor and captured with a camera (SPOT Imaging Solutions). Digitized images were segmented with segmentation techniques such as density and size thresholding to distinguish negative from positive objects using the image analysis software (ImageJ; NIH). The segmentation process resulted in the generation of binary images from which the number of stained objects and total numbers of nuclei was determined. Results were statistically analyzed using One-way ANOVA on GraphPad Prism 5.

In-vitro Differentiation Assays. Glass coverslips (Corning) were coated with PBS diluted laminin (Invitrogen, 23017-0015) for 2 hours, washed with PBS and then single cell dissociated cells were plated onto the coated coverslips at a density of 30,000/cm<sup>2</sup> and cells were allowed to attach overnight. The following day individual coverslips were placed into differentiating conditions (1% FBS with 1 $\mu\text{M}$  retinoic acid) along with treatments for 4 or 7 days with the media being replenished on day 4. Cells were then fixed with 4% PFA for 30 minutes at room temperature, and permeabilized with a 0.05% triton-x solution. Primary antibodies were then applied; Nestin 1:200 (Millipore), GFAP 1:1000 (Dako), and DAPI followed by secondary antibodies with fluorescent tags (Invitrogen), and then mounted on slides. Digitized Images were obtained and segmentation techniques such as density and size thresholding was done on 3 fields of view from each slide with an average of 1500 cells/view using ImageJ software (NIH).

Chromatin Immunoprecipitation: TS603 cells were grown in medium containing either AGI-5198 (1.5 $\mu\text{M}$ ) or DMSO vehicle control. One week prior to harvest cells were transferred to differentiation medium (DMEM F12; 15mM HEPES; 0.06% glucose; B27 without vitamin A; N2; Insulin/transferrin; 1% FBS) containing freshly added retinoic acid (1 $\mu\text{M}$ ). ChIP of non-cross-linked cells was then carried out using established ChIP methods. 350 $\mu\text{g}$  of lysate was immunoprecipitated-using anti-H3K9Me3 (ab8898, abcam), H3K27me3 (#9733S, Cell Signaling) or Rabbit Control IgG (ab46540, abcam). After washing, ChIP DNA was eluted from protein G beads and analyzed by RT-PCR using SYBR green (Applied Biosystems). Relative occupancy was calculated using the standard curve method and fold enrichment versus IgG. Enrichment in AGI-5198-treated cells was normalized to vehicle control. Means and standard deviation were calculated from 4 technical replicates.

RT-PCR. RNA was isolated from 20-30 mg of tumor tissue using the Qiagen RNeasy Plus protocol. RNA concentrations were then normalized and cDNA generated using the high-capacity cDNA reverse transcription protocol from Applied Biosciences (ABI catalog number 4368813). Q-PCR was on a 7900HT Fast Real Time PCR machine using a standard delta relative quantitation ( $\Delta\Delta\text{RQ}$ ) QPCR protocol. Cycles length was 50C 2 minutes, 95C 10 minutes, then 40 cycles of 95C 15 seconds and 60C 1 minute. TaqMan (R) Gene Expression Assay: ATP1A2 (FAM): SMID: Hs00265131\_m1, GFAP(FAM): SMID: Hs00909233\_m1, APQ4(FAM): SMID: Hs00242342\_m1, CNP(FAM): SMID: Hs00263981\_m1, CSPG4(NG2)(FAM): SMID: Hs00426981\_m1.

RNA and DNA Extraction. DNA and RNA was extracted from microdissected sections from TS603 xenografts that had been snap frozen in liquid nitrogen and stored at -80°C. Xenograft DNA was extracted with the Qiagen DNeasy Blood and Tissue Kit protocol, and xenograft RNA was

extracted using the Qiagen RNeasy Lipid Tissue protocol. In addition, DNA from TS603 cells treated with DMSO or 1.5uM AGI-5198 at passages 0, 2, 4, 15, and 20 was extracted using the Qiagen DNeasy Blood and Tissue Kit protocol.

Data Analysis. TS603 expression data was RMA normalized from the raw CEL files in Partek. Hierarchical clustering was performed on log transformed and normalized data. Analysis of variance was performed using Partek Genomic Suite and genes were filtered for p-value<0.05. Clustering was performed using Cluster 3.0 with average Pearson correlation as the similarity metric and visualized using Treeview. Functional analysis was performed using GSEA with the MolSigDB C2-pathways downloaded from the Broad Institute website (<http://www.broadinstitute.org/gsea/msigdb/collections.jsp>). The rank list was created by collapsing to max probe with signal to noise ratio as metric. One thousand permutations were employed to generate nominal p-values. Genes significantly (p-value <= 0.05) upregulated or downregulated in both AGI-5189 150 mg/kg and 450 mg/kg treatment groups with a fold change >=1.5 were selected. Enrichment analysis was performed using the Database for Annotation, Visualization and Integrated Discovery (DAVID) using all human genes as the background set and with Ingenuity IPA using Agilent Human Genome U133 Plus 2.0 probes as the background set. The methylation array beta value data was generated from intensity values using Genome Studio Software (Illumina) and imported into Partek. The  $\beta$ -values are given by  $\beta = (\text{methylated probe intensity} / (\text{methylated probe intensity} + \text{unmethylated probe intensity}))$ . TS603 xenograft delta beta values were calculated for all probes as  $\text{delta} = \text{mean } \beta_{\text{treated}} - \text{mean } \beta_{\text{vehicle}}$ . Corresponding intermediate grade glioma delta beta values were calculated as  $\text{delta} = \text{mean } \beta_{\text{mutant}} - \text{mean } \beta_{\text{wildtype}}$ .

CIMP Analysis in TS603 Cells. The previously published intermediate grade glioma (WHO Grade II/III) whole genome methylation beta values (3) were used to calculate mean beta values for each class and their frequency distribution was plotted alongside the vehicle-treated TS603 xenograft data without further normalization. Intermediate grade glioma (WHO Grade II/III) and high grade glioma (WHO Grade IV) methylation data was limited to only probes that corresponded to the transcription start sites (140,000 probes). The most variant probes were identified to create two unique sets of ~5000 probes that would define CIMP status. TS603 methylation data was then incorporated into either the LGG or the TCGA files, and the resulting datasets were analyzed with 2 dimensional hierarchical cluster on the un-standardized beta values using Pearson's dissimilarity as the similarity metric.

Integration of Methylation and Transcription Data. For our integrated analysis of DNA methylation and RNA expression changes, methylation data were logit transformed and gene expression data were log2 transformed after RMA normalization. We calculated p-values using a Student's t-test (two-sample equal variance). P-values were then negative log10 transformed for the purpose of visualization, assigned directionality based on IDH1 mutation (low grade glioma tumors) or treatment (mouse xenograft), and plotted on log-log scatter plots. Negative directionality corresponds to a decrease and positive directionality corresponds to an increase in transcription or methylation. Signed log10 p-values for transcription and methylation probes were matched by gene symbol, based on the annotations provided by respective platform manufacturers (Illumina and Affymetrix). Threshold lines on the log10 plots were drawn at -1.3 and 1.3 (p-value = 0.05). All RNA expression arrays and DNA methylation arrays were run at the Genomics Core Facility at Memorial Sloan-Kettering Cancer Center.

**Beta and Delta Beta Values.**  $\beta$ -values represent the ratio of methylated/(methylated + unmethylated) DNA and are reported for ~ 485,000 probes in the Infinium Human Methylation450 Arrays. Figure 4 B shows the distribution of  $\beta$ -values in vehicle versus AGI-5198 treated TS603 xenograft tumors. For the prolonged in vitro exposure of TS603 cells (Fig. S16), delta beta values were calculated from biological duplicates as  $\text{delta} = \text{mean } \beta_{\text{treated}} - \text{mean } \beta_{\text{vehicle}}$  for each of the four passage points. Delta beta values greater than 0.2 or less than -0.2 were included in the overlap analysis.

**Hierarchical Clustering.** For analysis of gene expression patterns from AGI-5198-treated TS603 glioma xenografts, clustering was performed on log transformed and normalized data. Analysis of variance was performed using Partek Genomic Suite and genes were filtered for  $p$ -value  $< 0.05$ . Clustering was performed using Cluster 3.0 with average Pearson correlation as the similarity metric and visualized using Treeview. Probes were filtered using an ANOVA  $p$ -value threshold of 0.05 between the three treatment groups ( $n = 6492$  probes).

### Supplementary Text

**Changes in DNA methylation during prolonged in-vitro culture with mIDH1 inhibitor.** Treatment of leukemia cells with the DNA methyltransferase inhibitor decitabine (DAC) has been reported to result in DNA hypomethylation (i.e., a left-shift in the  $\beta$ -value distribution) within a timeframe of days (4). This is in contrast to our observations following acute inhibition of mutant IDH1 in glioma cells. Active DNA demethylation involves multiple steps after the initial hydroxylation of 5-methylcytosine by TET proteins (5) and may follow slower kinetics than passive demethylation occurring when maintenance DNA methylation is blocked. We therefore examined the effects of AGI-5198 on genome-wide DNA methylation during prolonged drug exposure in-vitro. We cultured TS603 glioma cells continuously in the presence of 1.5 $\mu$ M AGI-5198 or vehicle, collected DNA samples at multiple passage numbers (# 2, #4, #15, #20), hybridized the DNA to methylation arrays, and determined the difference in DNA methylation between AGI-5198 and vehicle treated cells (expressed as a delta- $\beta$ -value for each probe). Independent biological replicates were collected for each condition. At early passage numbers (passage # 2 and 4), we noted a narrow distribution of delta  $\beta$ -values indicating no significant differences in DNA methylation between vehicle and AGI-5198 treated samples. The number of probes with a decrease in delta  $\beta$ -value (demethylation) of 0.2 or greater increased markedly between the two early passages ( $n=3$  and  $n=7$  probes, respectively) and the late passages ( $n=8012$  and  $n=6746$  probes, respectively). The majority of probes ( $5935/8012 = 74.1\%$ ) with a decrease in delta  $\beta$ -value of 0.2 or greater at passage 15 also showed a similar or greater decrease in DNA methylation at passage 20 (Fig.S16) whereas we observed minimal overlap (1 probe) between the two early passages. While these data point to an active role of the mutant IDH1 enzyme in epigenetic remodeling, changes in DNA methylation in response to inhibition of the mutant enzyme were limited to a small fraction of the genome ( $< 2\%$ ) and followed kinetics that are unlikely to drive gene expression changes within the short timeframe of our in-vivo xenograft experiments.

**Gene expression programs associated with in-vivo growth inhibition by mutant IDH1 inhibitor.** To identify pathways that are associated with the growth-inhibitory effects of AGI-5198, we ran Affymetrix RNA expression arrays for all TS603 xenograft tumors in the AGI-5198 dose-response experiment for which we were able to isolate RNA and DNA of sufficient quality and quantity (23/30 total tumors). 41 probes showed a statistically significant ( $p<0.05$ ) change in RNA expression ( $\geq 1.5$ -fold) in both AGI-5198 treated cohorts (i.e., 150 mg/kg and 450 mg/kg groups)(Table S2). Functional annotation algorithms (Ingenuity® Systems, www.ingenuity.com)

assign many of these genes to Cardiovascular System Development and Function (PER1, CTGF, GADD45A, LEPR, PIK3R1, ACTA2, PECAM1) and Tissue Morphology (PER1, CHRNA1, CALCRL, CTGF, LEPR, PIK3R1, ACTA2, PTGDS, TSC22D3, SERPINE2, SLITRK6, GADD45A, PROS1, ST8SIA2, PECAM1).

Integrated analysis of DNA methylation and RNA expression data. An integrated analysis of the DNA methylation data and RNA expression data showed that, in contrast to human gliomas where anti-correlated DNA methylation and gene expression changes are readily appreciated in a comparison between IDH-mutant and IDH wildtype tumors (Fig.S15A), much less change – and no correlation – is seen in a comparison of AGI-5198 and vehicle treated R132H-*IDH1* mutant glioma xenografts (Fig.S15B/C).

## References

1. L. Dang *et al.*, Cancer-associated IDH1 mutations produce 2-hydroxyglutarate. *Nature* **462**, 739 (2009). [doi:10.1038/nature08617](https://doi.org/10.1038/nature08617)
2. C. Lu *et al.*, IDH mutation impairs histone demethylation and results in a block to cell differentiation. *Nature* **483**, 474 (2012). [doi:10.1038/nature10860](https://doi.org/10.1038/nature10860)
3. S. Turcan *et al.*, IDH1 mutation is sufficient to establish the glioma hypermethylator phenotype. *Nature* **483**, 479 (2012). [doi:10.1038/nature10866](https://doi.org/10.1038/nature10866)
4. H.-C. Tsai *et al.*, Transient low doses of DNA-demethylating agents exert durable antitumor effects on hematological and epithelial tumor cells. *Cancer Cell* **21**, 430 (2012). [doi:10.1016/j.ccr.2011.12.029](https://doi.org/10.1016/j.ccr.2011.12.029)
5. J. S. You, P. A. Jones, Cancer genetics and epigenetics: Two sides of the same coin? *Cancer Cell* **22**, 9 (2012). [doi:10.1016/j.ccr.2012.06.008](https://doi.org/10.1016/j.ccr.2012.06.008)



## Supplementary Figures

### Fig. S1.

Assay for determination of compound inhibition potency against the *R132H-IDH1* enzyme.

A Diaphorase/Resazurin coupled system reaction was used for both the High-Throughput Screen and subsequent IC50 determinations to map the SAR of compounds (see Methods Section).

### Fig. S2

Pharmacokinetic in-vivo profile of AGI-5198 in TS603 glioma xenografts.

(A) Dosing schedule for pharmacokinetic analysis of AGI-5198 in TS603 xenograft bearing mice.

(B) Concentration of AGI-5198 measured in plasma and tumor samples.

### Fig. S3

Treatment with AGI-5198 does not result in loss of body weight.

Shown are the body weight of *SCID* mice treated daily with AGI-5198 (450mg/kg daily by gavage; n=20 per group).

### Fig. S4

mIDH1 inhibitor reduces proliferation of *R132H-IDH1* mutant glioma cells in mice.

Shown is immunohistochemistry (IHC) of TS603 xenografts treated with vehicle (top) or AGI-5198 (bottom). TS603 glioma xenografts show reduced staining for Ki-67 (left panel), but no difference in staining for cleaved caspase-3 (right panel). Tumors were harvested after 16 days of treatment with AGI-5198. Scale bar = 100 $\mu$ M.

### Fig. S5

IDH1-knockdown impairs growth of *R132H-IDH1* mutant glioma cells in soft-agar.

Shown are the number of colonies of *R132H-IDH1* glioma cells (TS603) engineered to express two different doxycycline-inducible IDH1-shRNAs and grown in soft agar in absence or presence of doxycycline (DOX) (\* p < 0.05).

### Fig. S6

Doxycycline does not impair the in-vivo growth of *R132H-IDH1* glioma cells (TS603).

Shown are tumor volumes of TS603 cells engineered to express the empty shRNA vector and treated with doxycycline. Doxycycline-containing chow was started after subcutaneous xenograft tumors were established. n = 15 mice per cohort.

### **Fig. S7**

Depletion of mIDH1 protein and intratumoral *R*-2HG in TS603-IDH1-shRNA xenograft tumors from doxycycline-treated mice.

The left panel shows IHC with an R132H-IDH1 specific antibody. The right panel shows intratumoral *R*-2HG concentrations. Mice were treated with doxycycline, vehicle, or AGI-5198 as indicated in the text. Scale bar =100 $\mu$ M. n=15 mice per cohort.

### **Fig. S8**

IDH1 knockdown impairs growth of R132C-IDH1 mutant HT1080 fibrosarcoma cells.

(A) Western blot of HT1080 cells that were engineered to express empty vector or two doxycycline-inducible IDH1 shRNAs and treated with 2.5  $\mu$ g/mL doxycycline (DOX) or vehicle for 4 days. (B) Doxycycline-induced IDH1 knockdown impairs colony formation of HT1080 cells in soft agar (\* p < 0.05). (C) HT1080 xenografts that harbor the inducible IDH1 shRNA show impaired growth when mice are treated with doxycycline (\* p < 0.05). n = 11 mice per cohort. Doxycycline was started after subcutaneous tumors were established.

### **Fig. S9**

*R132H-IDH1* mutant TS603 glioma cells and *IDH1/2*-mutant gliomas show an increased number of hypermethylated gene loci using Illumina Infinium Human Methylation450 Arrays.

Shown is a comparison of genome wide DNA methylation ( $\beta$  value distribution) of IDH1- mutant TS603 xenografts (n=6), IDH1/2- mutant human gliomas (n=49), and IDH1/2-wildtype gliomas (n=31). Note the increased number of highly-methylated probes ( $\beta$  values > 0.7) in IDH1/2-mutant gliomas and IDH1- mutant TS603 glioma xenografts (compared to IDH1/2-wildtype gliomas).

### **Fig. S10**

*R132H-IDH1* mutant TS603 glioma cells are G-CIMP positive.

*IDH1*- mutant TS603 glioma cells cluster with *IDH1/2*-mutant glioblastomas (WHO grade IV) (A) and *IDH1/2*-mutant intermediate grade gliomas (WHO Grade II/III) (B). Unsupervised two-dimensional hierarchical clustering was performed using the top ~5000 most variant ( $\beta$  value) transcription start site (TSS) methylation probes (see Methods Section).

### **Fig. S11**

AGI-5198 (450 mg/kg) reduces H3K9m3 levels in IDH1 mutant glioma cells.

Shown are representative images of R132H-*IDH1* mutant TS603 glioma xenografts treated with either vehicle (top left) or 450 mg/kg AGI-5198 (bottom left). The top right and bottom right panels show a negative (external granule cell layer of p7 murine cerebellum) and a positive (murine myocardium, E16.5) staining control. Scale bar = 50 $\mu$ M.

### Fig. S12

AGI-5198 does not affect H3K9M3 methylation in IDH1-wildtype cells.

(A) Quantification of H3K9 trimethylation in IDH1-wildtype glioma xenografts (TS516) treated for two weeks with vehicle, 150 mg/kg AGI-5198, or 450 mg/kg AGI-5198. (B) Western blot of NHAs engineered to express empty vector (pQCXIH) or R132H-IDH1 (pQCXIH) and treated with AGI-5198 (1.5  $\mu$ M) for the indicated time (in days). NHAs were a kind gift from Russ Pieper (University of California, San Francisco.)

### Fig. S13

AGI-5198 impairs tumor cell proliferation in R132H-IDH1 glioma xenografts.

Shown are representative Ki-67 IHC images (left) and image quantification (% positive cells)(right) from mice treated with for two weeks with vehicle, 150 mg/kg AGI-5198, or 450 mg/kg AGI-5198 (\*  $p < 0.05$ ). White scale bars represent 200 $\mu$ M.  $n=15$  mice per cohort.

### Fig. S14

Hierarchical clustering of genome wide RNA expression from vehicle and AGI-5198-treated TS603 glioma xenografts.

Clustering was performed on log transformed and normalized data (see Methods Section).

### Fig. S15

AGI-5198-induced changes in RNA expression (x-axis) correlate poorly with changes in DNA methylation (y-axis) in R132H-*IDH1* glioma xenografts.

The relationship between *IDH1*-mutation associated differences in RNA expression and DNA methylation in human low grade gliomas is shown in (A) as a point of reference. Signed log<sub>10</sub> p-values express the statistical significance of the difference. Threshold lines are drawn to represent statistical significance at  $p\text{-value}=0.05$  ( $\log_{10}(0.05) = 1.3$ ). Directionality (sign) is assigned based on increasing (positive) or decreasing (negative) methylation (y-axis) or RNA expression (x-axis)(see Methods Section). Green data points represent probes with significant decrease in methylation and increase in gene expression (methylation signed log<sub>10</sub> p-value  $<-1.3$ , gene expression signed log<sub>10</sub> p-value  $>1.3$ ). Red data points represent probes with a significant increase in methylation and decrease in gene expression (methylation signed log<sub>10</sub> p-value  $>1.3$ , gene expression signed log<sub>10</sub> p-value  $<-1.3$ ). While anti-correlated DNA methylation and RNA expression changes are obvious in the comparison of IDH-mutant versus IDH-wildtype human

gliomas (A), much less change – and no correlation – is seen in response to mIDH1-inhibitor treatment of the xenografts tumors (B: 150 mg/kg, C: 450 mg/kg).

**Fig. S16**

Progressive changes in DNA methylation during continued in-vitro exposure of R132H-*IDH1* TS603 cells to AGI-5198.

Shown is the number of probes on the Illumina Infinium Human Methylation 450 Arrays that show a decrease in DNA-methylation ( $\Delta \beta < -0.2$ ) between vehicle and AGI-5198 treated cells at each indicated passage number. Replicate arrays were run for all conditions. Note the increasing number of probes that show a consistent change in DNA methylation (Venn Diagram) between the two early passages (passage # 2 and # 4, top) versus two late passages (passage # 15 and 20, bottom).

**Table S1.**

List of genes that are upregulated or downregulated in TS603 xenografts in response to AGI-5198 treatment (compared to vehicle).

| Direction | Rank | Fold Change | Probeset ID | Gene Symbol | Gene Title                                                                                           | p-value |
|-----------|------|-------------|-------------|-------------|------------------------------------------------------------------------------------------------------|---------|
| UP        | 1    | 6.8         | 209904_at   | TNNC1       | troponin C type 1 (slow)                                                                             | 0.000   |
| UP        | 2    | 5.9         | 202404_s_at | COL1A2      | collagen, type I, alpha 2                                                                            | 0.001   |
| UP        | 3    | 5.7         | 225275_at   | EDIL3       | EGF-like repeats and discoidin I-like domains 3                                                      | 0.009   |
| UP        | 4    | 4.3         | 239430_at   | IGFL1       | insulin growth factor-like family member 1                                                           | 0.001   |
| UP        | 5    | 4.0         | 213764_s_at | MFAP5       | microfibrillar associated protein 5                                                                  | 0.002   |
| UP        | 6    | 3.9         | 211748_x_at | PTGDS       | prostaglandin D2 synthase 21kDa (brain)                                                              | 0.001   |
| UP        | 7    | 3.8         | 212187_x_at | PTGDS       | prostaglandin D2 synthase 21kDa (brain)                                                              | 0.001   |
| UP        | 8    | 3.7         | 229218_at   | COL1A2      | Collagen, type I, alpha 2                                                                            | 0.001   |
| UP        | 9    | 3.6         | 202403_s_at | COL1A2      | collagen, type I, alpha 2                                                                            | 0.004   |
| UP        | 10   | 3.3         | 201163_s_at | IGFBP7      | insulin-like growth factor binding protein 7                                                         | 0.009   |
| UP        | 11   | 3.3         | 228854_at   | ZBTB16      | zinc finger and BTB domain containing 16                                                             | 0.000   |
| UP        | 12   | 3.3         | 218002_s_at | CXCL14      | chemokine (C-X-C motif) ligand 14                                                                    | 0.003   |
| UP        | 13   | 3.1         | 222484_s_at | CXCL14      | chemokine (C-X-C motif) ligand 14                                                                    | 0.002   |
| UP        | 14   | 2.9         | 201058_s_at | MYL9        | myosin, light polypeptide 9, regulatory                                                              | 0.003   |
| UP        | 15   | 2.8         | 211663_x_at | PTGDS       | prostaglandin D2 synthase 21kDa (brain)                                                              | 0.002   |
| UP        | 16   | 2.7         | 213765_at   | MFAP5       | microfibrillar associated protein 5                                                                  | 0.001   |
| UP        | 17   | 2.5         | 202237_at   | NNMT        | nicotinamide N-methyltransferase                                                                     | 0.004   |
| UP        | 18   | 2.4         | 206029_at   | ANKRD1      | ankyrin repeat domain 1 (cardiac muscle)                                                             | 0.003   |
| UP        | 19   | 2.3         | 209047_at   | AQP1        | aquaporin 1 (Colton blood group)                                                                     | 0.049   |
| UP        | 20   | 2.2         | 200974_at   | ACTA2       | actin, alpha 2, smooth muscle, aorta                                                                 | 0.035   |
| UP        | 21   | 2.2         | 203186_s_at | S100A4      | S100 calcium binding protein A4 (calcium protein, calvasculin, metastasin, murine placental homolog) | 0.001   |
| UP        | 22   | 2.2         | 209616_s_at | CES1        | carboxylesterase 1 (monocyte/macrophage serine esterase 1)                                           | 0.029   |
| UP        | 23   | 2.1         | 202238_s_at | NNMT        | nicotinamide N-methyltransferase                                                                     | 0.013   |
| UP        | 24   | 2.1         | 229978_at   | LOC440338   | hypothetical gene supported by AJ002784                                                              | 0.005   |
| UP        | 25   | 2.1         | 226228_at   | AQP4        | aquaporin 4                                                                                          | 0.016   |
| UP        | 26   | 2.1         | 230425_at   | EPHB1       | EPH receptor B1                                                                                      | 0.042   |
| UP        | 27   | 2.0         | 201150_s_at | TIMP3       | TIMP metalloproteinase inhibitor 3 (Sorsby fundus dystrophy, pseudoinflammatory)                     | 0.009   |
| UP        | 28   | 2.0         | 209101_at   | CTGF        | connective tissue growth factor                                                                      | 0.001   |

|      |    |     |             |          |                                                                                                                                                                       |       |
|------|----|-----|-------------|----------|-----------------------------------------------------------------------------------------------------------------------------------------------------------------------|-------|
| UP   | 29 | 2.0 | 223631_s_at | C19ORF33 | chromosome 19 open reading frame 33                                                                                                                                   | 0.026 |
| UP   | 30 | 2.0 | 203296_s_at | ATP1A2   | ATPase, Na <sup>+</sup> /K <sup>+</sup> transporting, alpha 2 (+) polypeptide                                                                                         | 0.045 |
| UP   | 31 | 2.0 | 203878_s_at | MMP11    | matrix metalloproteinase 11 (stromelysin 3)                                                                                                                           | 0.011 |
|      |    |     |             |          |                                                                                                                                                                       |       |
| DOWN | 1  | 2.4 | 1552714_at  | CREG2    | cellular repressor of E1A-stimulated genes 2                                                                                                                          | 0.003 |
| DOWN | 2  | 2.3 | 204338_s_at | RGS4     | regulator of G-protein signalling 4                                                                                                                                   | 0.017 |
| DOWN | 3  | 2.2 | 231489_x_at | ---      | Transcribed locus, weakly similar to NP_694983.1 hypothetical protein FLJ25952 [Homo sapiens]                                                                         | 0.011 |
| DOWN | 4  | 2.1 | 236297_at   | ---      | CDNA FLJ45742 fis, clone KIDNE2016327                                                                                                                                 | 0.033 |
| DOWN | 5  | 2.1 | 228708_at   | RAB27B   | RAB27B, member RAS oncogene family                                                                                                                                    | 0.043 |
| DOWN | 6  | 2.0 | 206214_at   | PLA2G7   | phospholipase A2, group VII (platelet-activating factor acetylhydrolase, plasma) /// phospholipase A2, group VII (platelet-activating factor acetylhydrolase, plasma) | 0.011 |
| DOWN | 7  | 2.0 | 235236_at   | DOCK2    | Dedicator of cytokinesis 2                                                                                                                                            | 0.022 |

**Table S2.**

List of genes that are upregulated or downregulated (compared to vehicle) in TS603 glioma xenografts treated with both doses of AGI-5198 (150 mg/kg and 450 mg/kg).

| Direction | Probeset ID  | Gene Symbol      | Gene Title                                                                             | 150 mg/kg p-value | 150 mg/kg fold change | 450 mg/kg p-value | 450 mg/kg fold change |
|-----------|--------------|------------------|----------------------------------------------------------------------------------------|-------------------|-----------------------|-------------------|-----------------------|
| UP        | 212187_x_at  | PTGDS            | prostaglandin D2 synthase 21kDa (brain)                                                | 0.005             | 3.389                 | 0.001             | 3.273                 |
| UP        | 211748_x_at  | PTGDS            | prostaglandin D2 synthase 21kDa (brain)                                                | 0.005             | 3.319                 | 0.001             | 3.125                 |
| UP        | 206633_at    | CHRNA1           | cholinergic receptor, nicotinic, alpha 1 (muscle)                                      | 0.019             | 3.648                 | 0.008             | 2.943                 |
| UP        | 211663_x_at  | PTGDS            | prostaglandin D2 synthase 21kDa (brain)                                                | 0.006             | 3.039                 | 0.001             | 2.791                 |
| UP        | 1556138_a_at | COL5A1           | Collagen, type V, alpha 1                                                              | 0.010             | 2.268                 | 0.000             | 2.422                 |
| UP        | 213056_at    | FRMD4B           | FERM domain containing 4B                                                              | 0.003             | 2.207                 | 0.010             | 2.074                 |
| UP        | 239537_at    | ST8SIA2          | ST8 alpha-N-acetylneuraminidase alpha-2,8-sialyltransferase 2                          | 0.019             | 1.990                 | 0.021             | 2.015                 |
| UP        | 228335_at    | CLDN11           | claudin 11                                                                             | 0.013             | 1.912                 | 0.023             | 1.906                 |
| UP        | 203810_at    | DNAJB4           | DnaJ (Hsp40) homolog, subfamily B, member 4                                            | 0.027             | 1.616                 | 0.003             | 1.862                 |
| UP        | 208763_s_at  | TSC22D3          | TSC22 domain family, member 3                                                          | 0.000             | 2.172                 | 0.014             | 1.852                 |
| UP        | 225768_at    | NR1D2            | nuclear receptor subfamily 1, group D, member 2                                        | 0.001             | 1.648                 | 0.000             | 1.845                 |
| UP        | 209833_at    | CRADD            | CASP2 and RIPK1 domain containing adaptor with death domain                            | 0.002             | 1.604                 | 0.001             | 1.841                 |
| UP        | 1552703_s_at | CARD16 /// CASP1 | caspase recruitment domain family, member 16 /// caspase 1, apoptosis-related cysteine | 0.020             | 1.958                 | 0.041             | 1.785                 |
| UP        | 234996_at    | CALCRL           | calcitonin receptor-like                                                               | 0.029             | 1.539                 | 0.036             | 1.708                 |
| UP        | 221307_at    | KCNIP1           | Kv channel interacting protein 1                                                       | 0.033             | 1.455                 | 0.003             | 1.687                 |
| UP        | 209101_at    | CTGF             | connective tissue growth factor                                                        | 0.002             | 1.892                 | 0.011             | 1.675                 |
| UP        | 201136_at    | PLP2             | proteolipid protein 2 (colonic epithelium-enriched)                                    | 0.001             | 1.758                 | 0.016             | 1.654                 |
| UP        | 203543_s_at  | KLF9             | Kruppel-like factor 9                                                                  | 0.006             | 1.562                 | 0.000             | 1.652                 |
| UP        | 202411_at    | IFI27            | interferon, alpha-inducible protein 27                                                 | 0.049             | 1.465                 | 0.023             | 1.652                 |

|      |             |                       |                                                                                                |       |        |       |        |
|------|-------------|-----------------------|------------------------------------------------------------------------------------------------|-------|--------|-------|--------|
| UP   | 226582_at   | LOC400043             | uncharacterized LOC400043                                                                      | 0.016 | 1.616  | 0.019 | 1.642  |
| UP   | 222717_at   | SDPR                  | serum deprivation response                                                                     | 0.026 | 1.647  | 0.022 | 1.633  |
| UP   | 228854_at   | ZBTB16                | zinc finger and BTB domain containing 16                                                       | 0.022 | 1.717  | 0.039 | 1.618  |
| UP   | 239638_at   | ---                   | ---                                                                                            | 0.000 | 1.751  | 0.002 | 1.593  |
| UP   | 212239_at   | PIK3R1                | phosphoinositide-3-kinase, regulatory subunit 1 (alpha)                                        | 0.001 | 1.832  | 0.033 | 1.572  |
| UP   | 203725_at   | GADD45A               | growth arrest and DNA-damage-inducible, alpha                                                  | 0.002 | 1.512  | 0.000 | 1.566  |
| UP   | 209894_at   | LEPR                  | leptin receptor                                                                                | 0.002 | 1.916  | 0.038 | 1.560  |
| UP   | 207808_s_at | PROS1                 | protein S (alpha)                                                                              | 0.007 | 1.516  | 0.012 | 1.557  |
| UP   | 200974_at   | ACTA2                 | actin, alpha 2, smooth muscle, aorta                                                           | 0.008 | 1.633  | 0.024 | 1.534  |
| UP   | 202861_at   | PER1                  | period homolog 1 (Drosophila)                                                                  | 0.000 | 1.787  | 0.017 | 1.530  |
| UP   | 208982_at   | PECAM1                | platelet/endothelial cell adhesion molecule 1                                                  | 0.002 | 1.741  | 0.004 | 1.528  |
| UP   | 208025_s_at | HMGA2                 | high mobility group AT-hook 2                                                                  | 0.040 | 1.458  | 0.043 | 1.520  |
| UP   | 230876_at   | ZNF883                | zinc finger protein 883                                                                        | 0.001 | 1.861  | 0.034 | 1.512  |
| UP   | 231270_at   | CA13 /// LOC100507258 | carbonic anhydrase XIII /// uncharacterized LOC100507258                                       | 0.020 | 1.556  | 0.039 | 1.498  |
| DOWN | 201295_s_at | WSB1                  | WD repeat and SOCS box containing 1                                                            | 0.019 | -1.539 | 0.006 | -1.659 |
| DOWN | 235976_at   | SLITRK6               | SLIT and NTRK-like family, member 6                                                            | 0.014 | -1.706 | 0.004 | -1.775 |
| DOWN | 212190_at   | SERPINE2              | serpin peptidase inhibitor, clade E (nexin, plasminogen activator inhibitor type 1), member 2  | 0.011 | -1.699 | 0.003 | -1.806 |
| DOWN | 206973_at   | PPFIA2                | protein tyrosine phosphatase, receptor type, family 1 polypeptide (PTPRF), interacting protein | 0.014 | -1.507 | 0.002 | -1.823 |
| DOWN | 212909_at   | LYPD1                 | LY6/PLAUR domain containing 1                                                                  | 0.008 | -1.496 | 0.000 | -1.853 |
| DOWN | 232176_at   | SLITRK6               | SLIT and NTRK-like family, member 6                                                            | 0.044 | -1.619 | 0.011 | -1.857 |
| DOWN | 228186_s_at | RSPO3                 | R-spondin 3                                                                                    | 0.034 | -1.915 | 0.035 | -2.009 |
| DOWN | 232481_s_at | SLITRK6               | SLIT and NTRK-like family, member 6                                                            | 0.007 | -1.901 | 0.001 | -2.081 |



**Fig.S1**

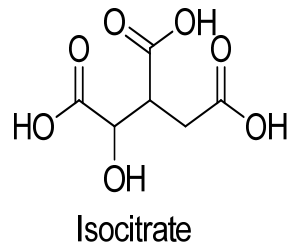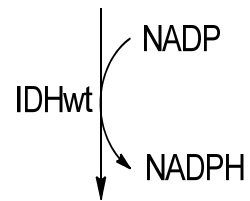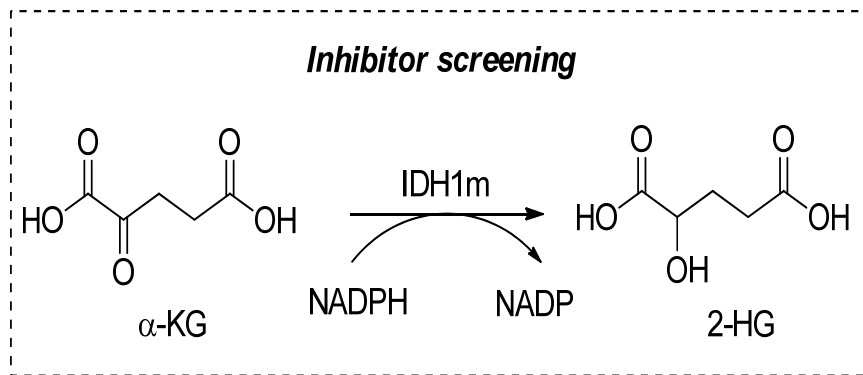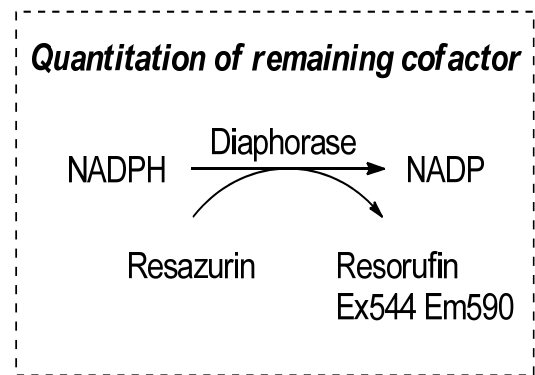

# Fig.S2

## A

| Dose (mpk) | # of time point | # of Dose | Comments           | Time points (hr) post last dose |
|------------|-----------------|-----------|--------------------|---------------------------------|
| 50         | 5               | 3         | BID 12 hr interval | 1, 3, 8, 12, 24                 |
| 150        | 5               | 3         | BID 12 hr interval | 1, 3, 8, 12, 24                 |
| Vehicle    | 8               | 3         | BID 12 hr interval | 0                               |

## B

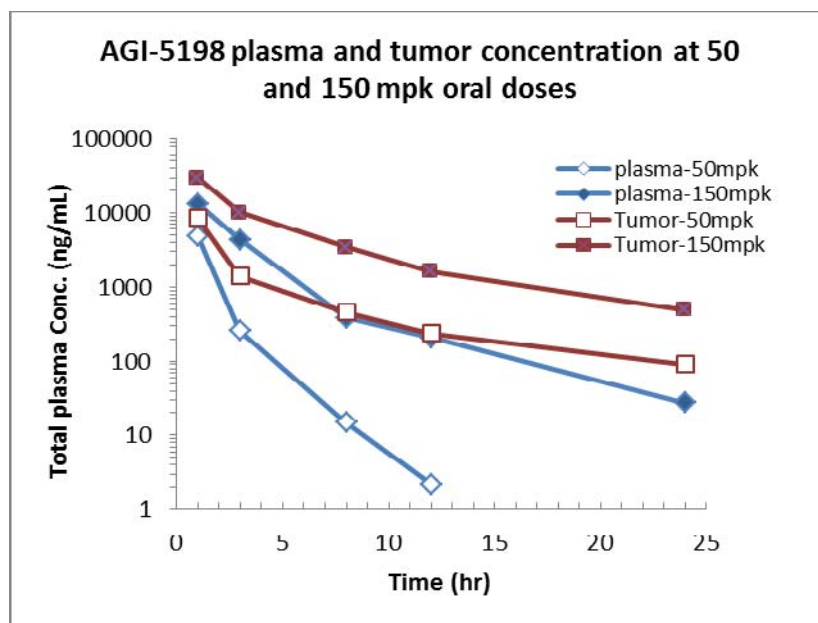

**Fig.S3**

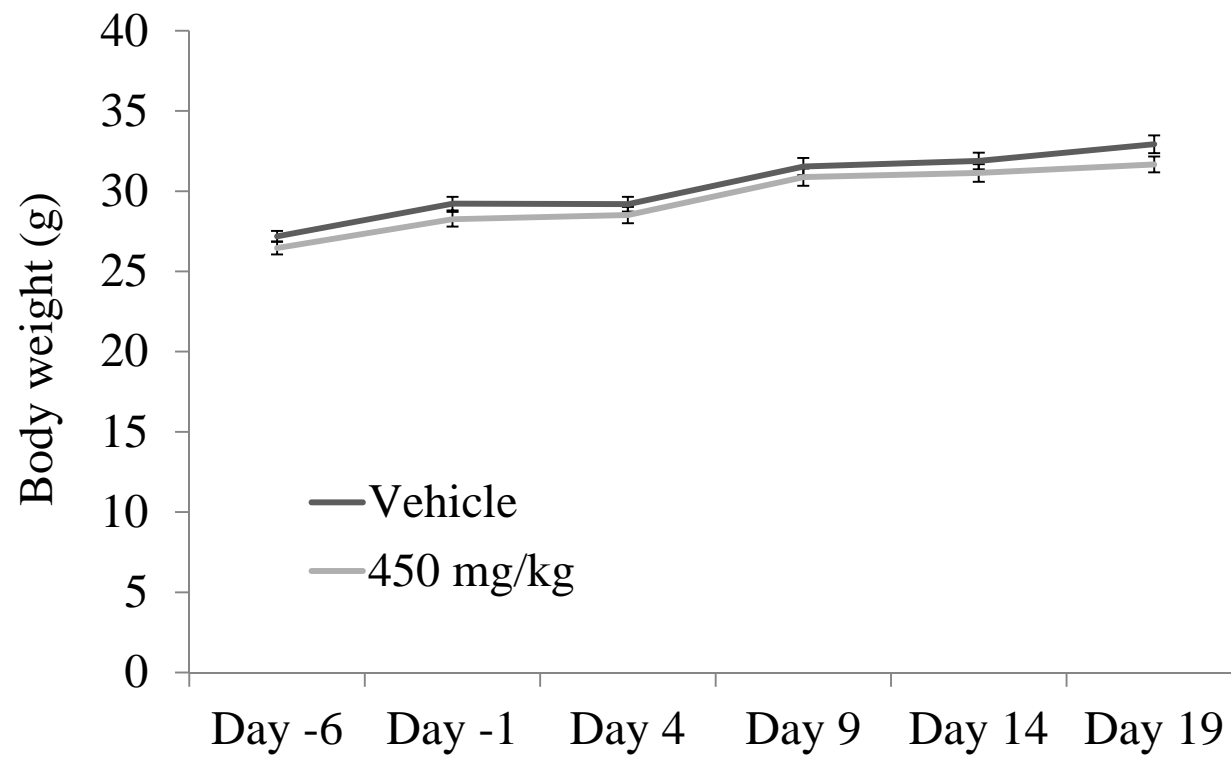

**Fig.S4**

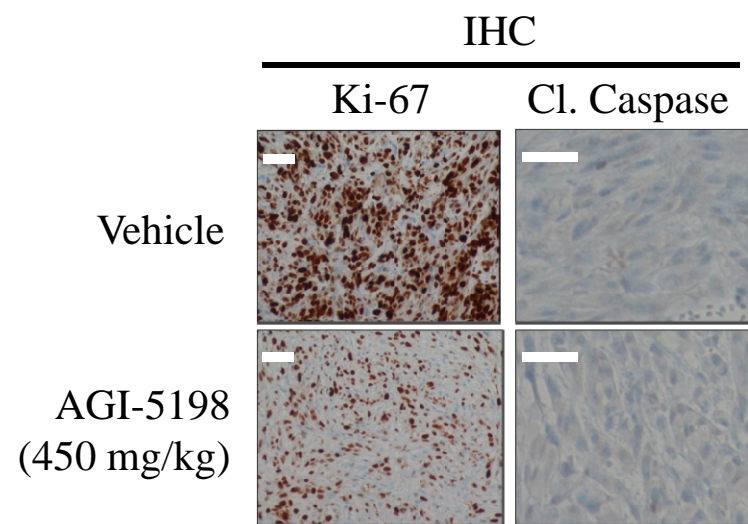

**Fig.S5**

**R132H-IDH1**  
**(TS603 glioma)**

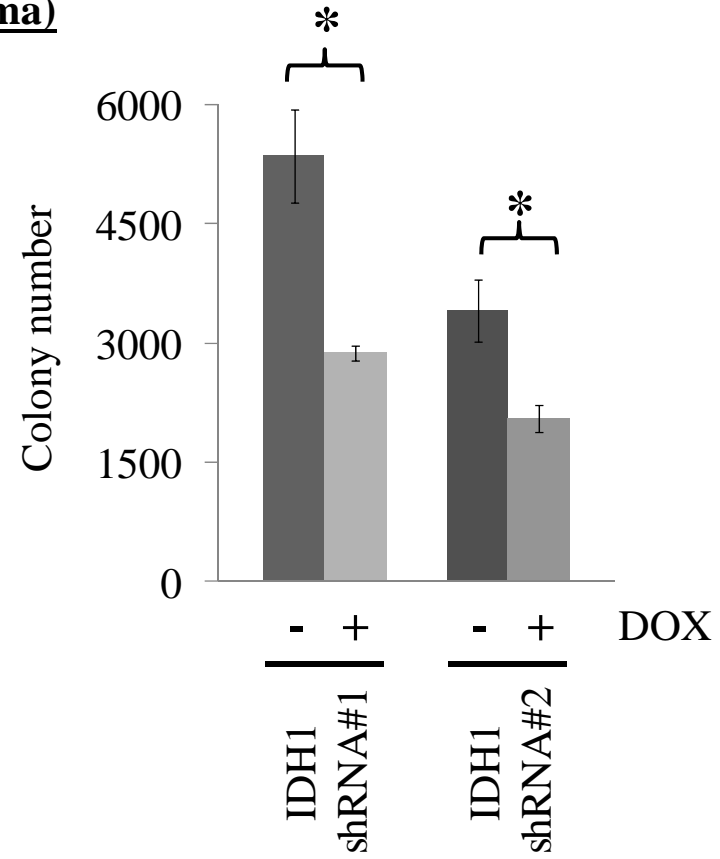

**Fig.S6**

**R132H-IDH1**  
**(TS603 glioma)**

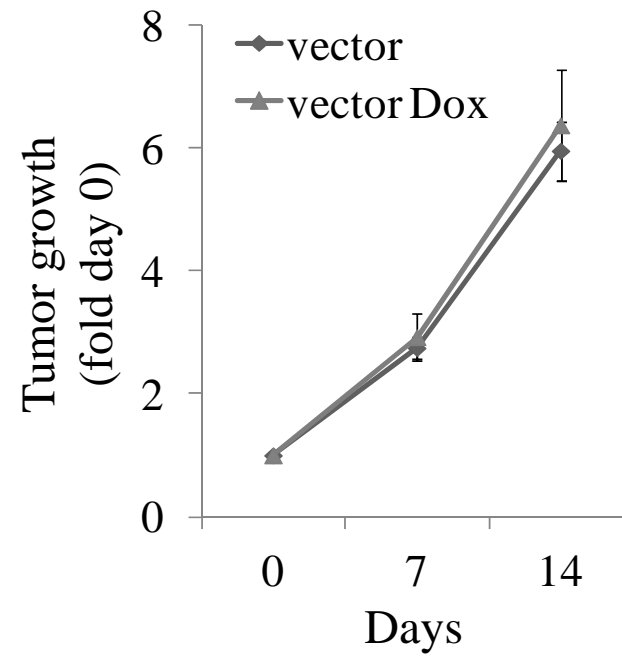

**Fig.S7**

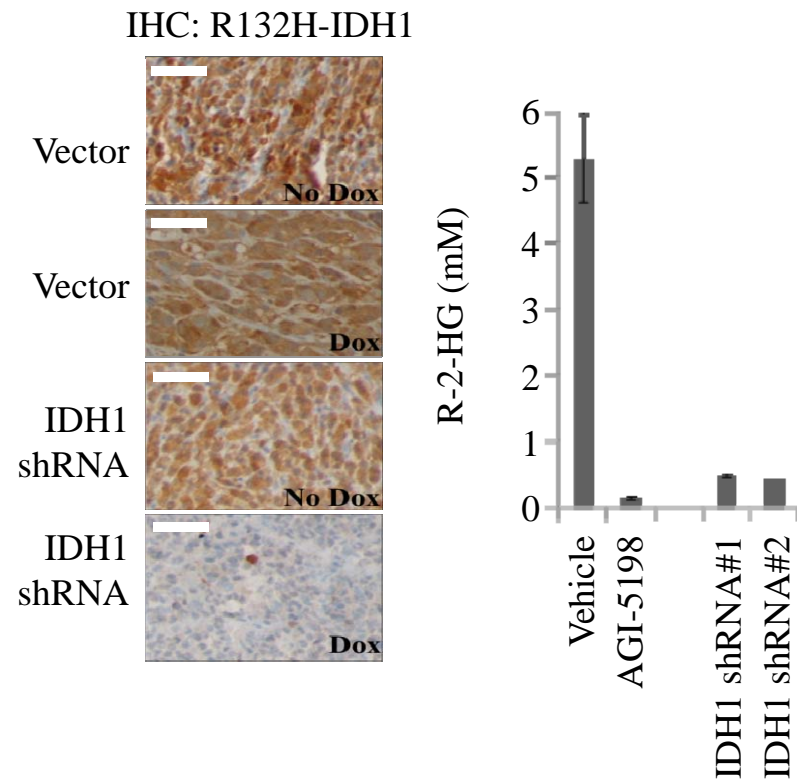

**Fig.S8**

**A**

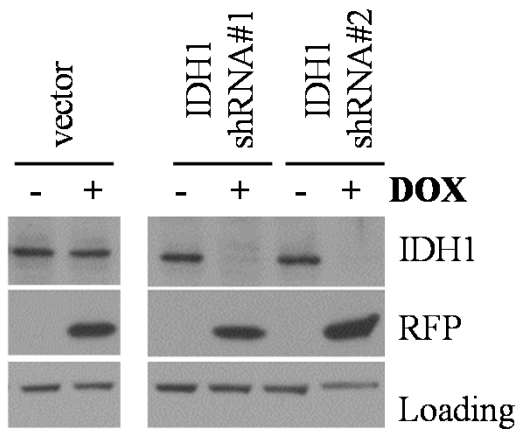

**B**

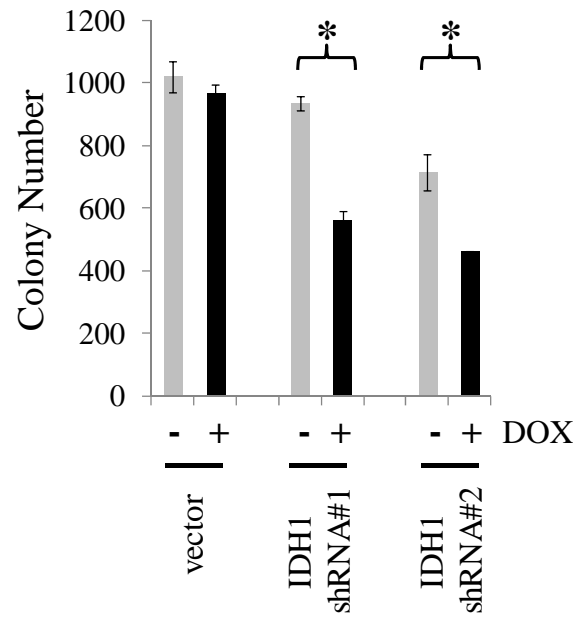

**C**

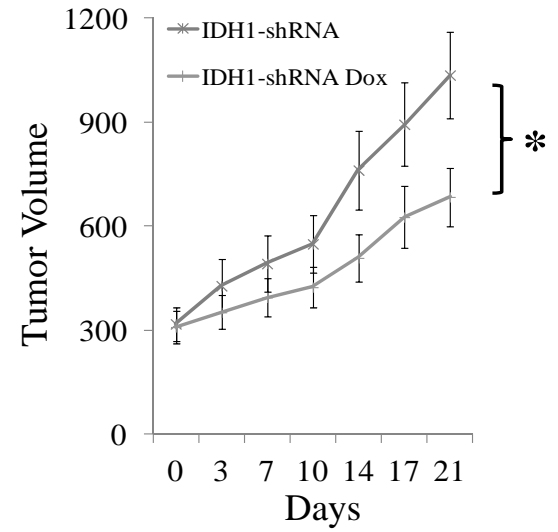

**HT1080 Fibrosarcoma**  
**R132C-IDH1**



**Fig.S9**

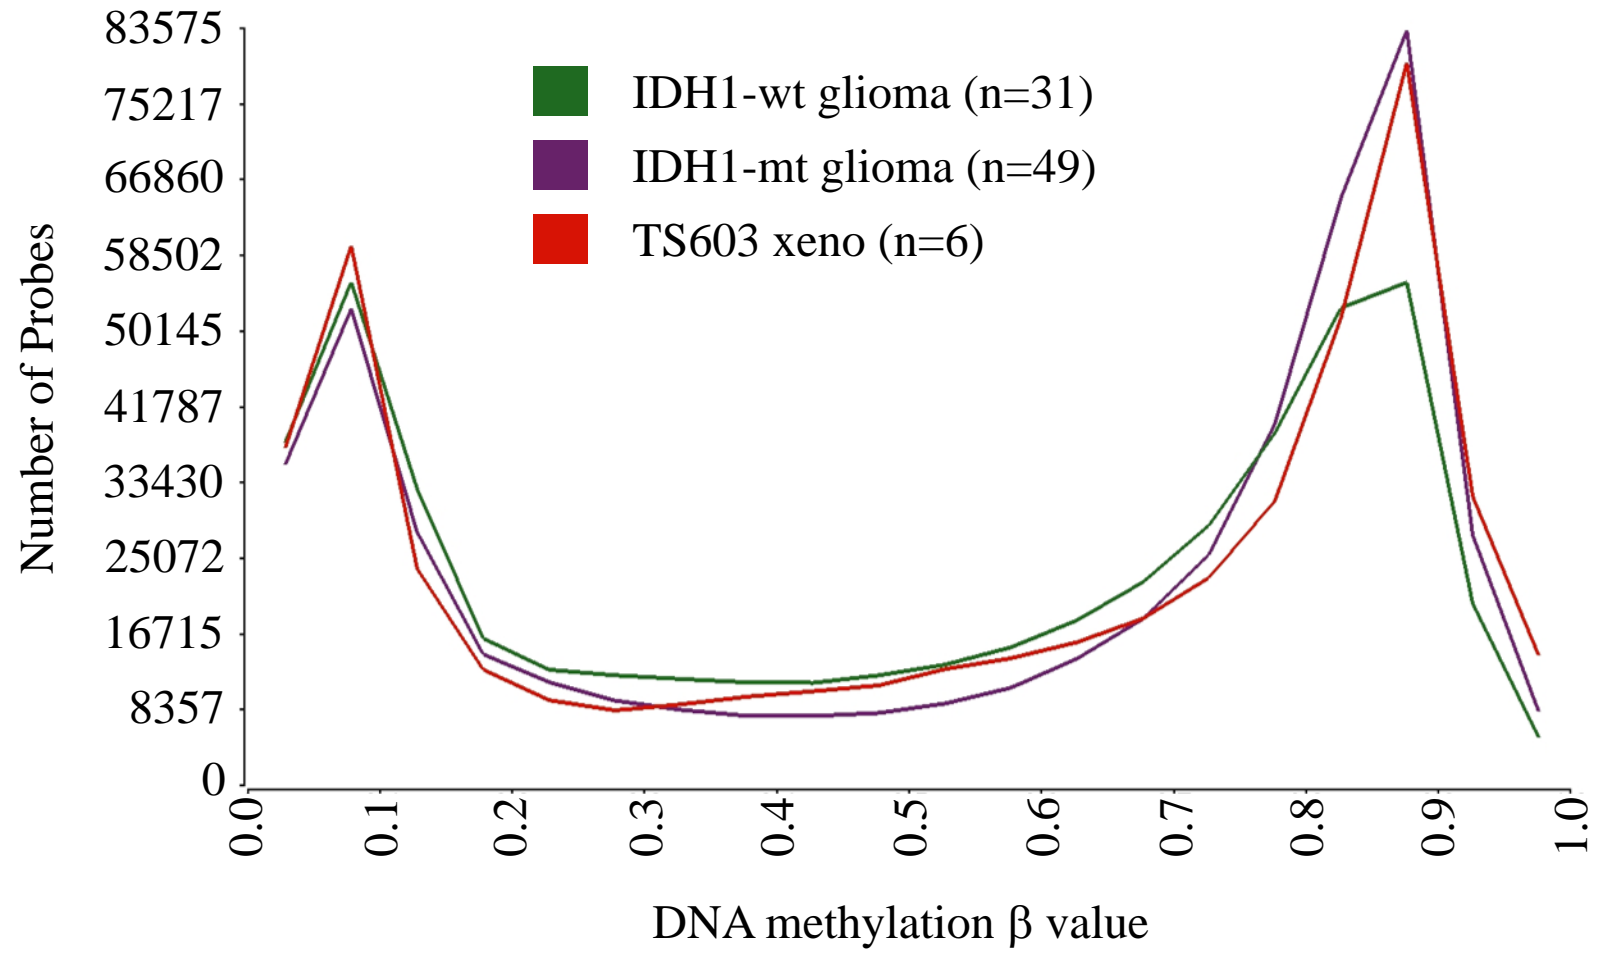

**Fig.S10**

**A**

Glioblastoma (WHO Grade IV)

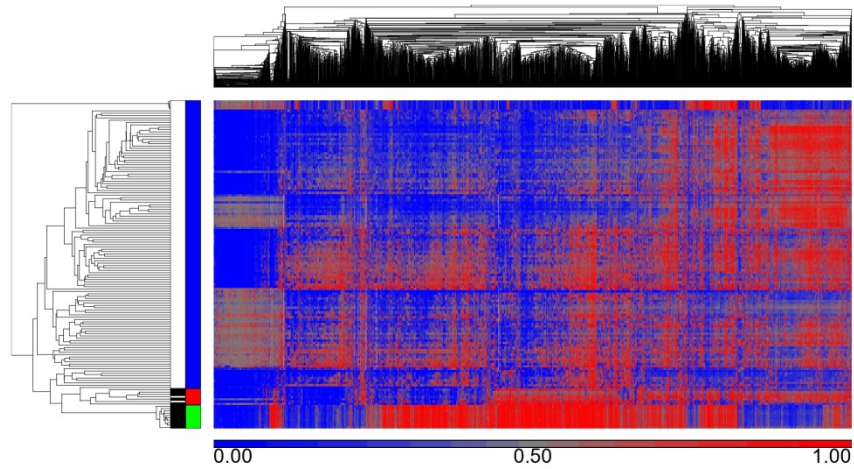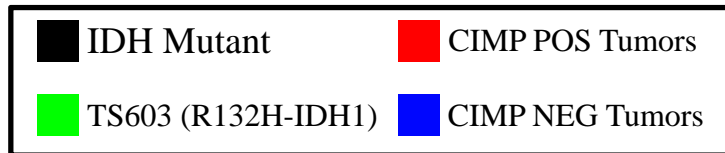

**B**

WHO Grade II/III Glioma

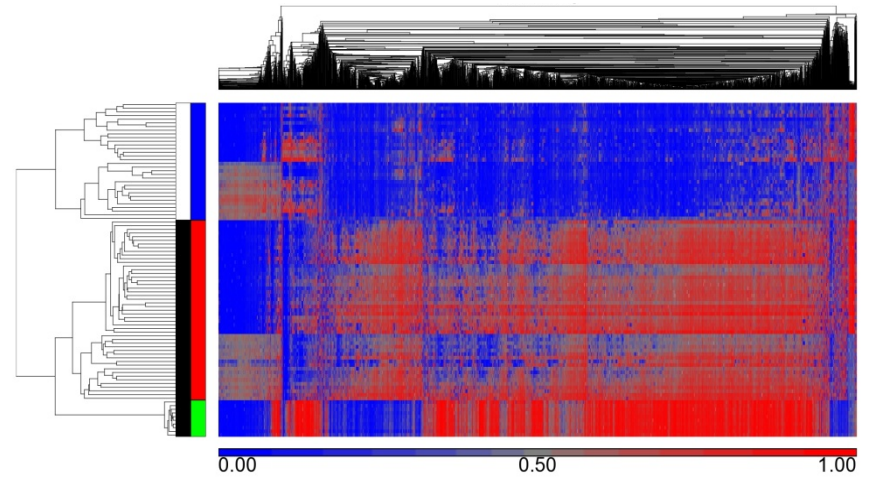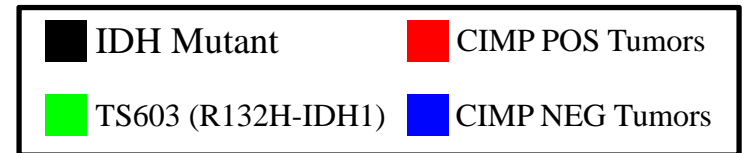

**Fig.S11**

**R132H-IDH1**  
**(TS603 glioma)**

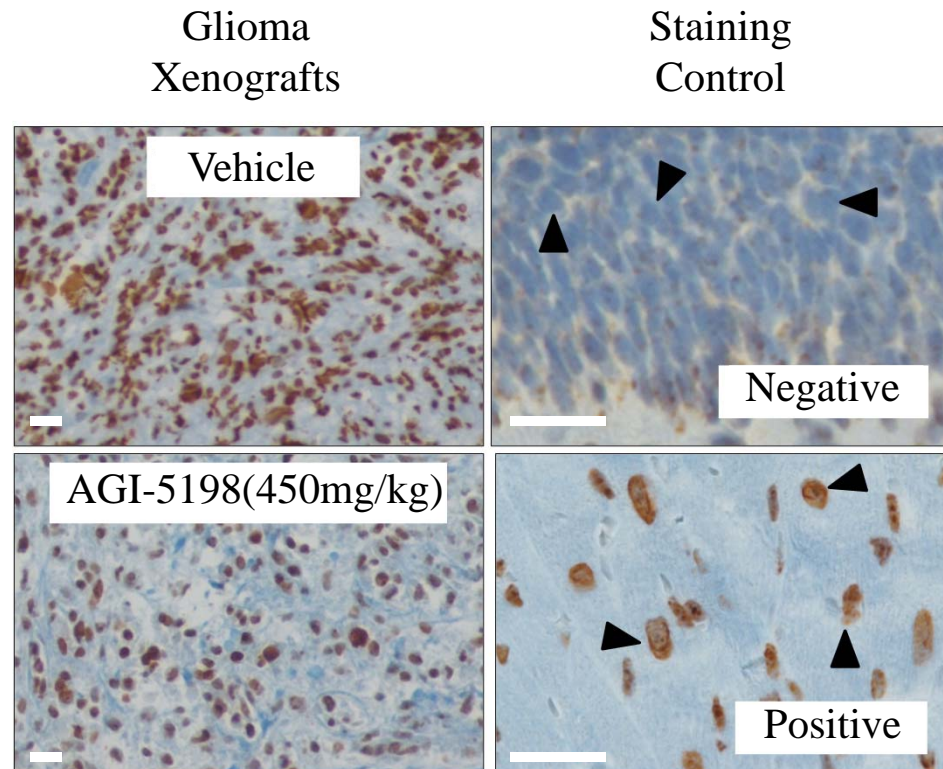

IHC: H3K9m3

**Fig.S12**

**A**

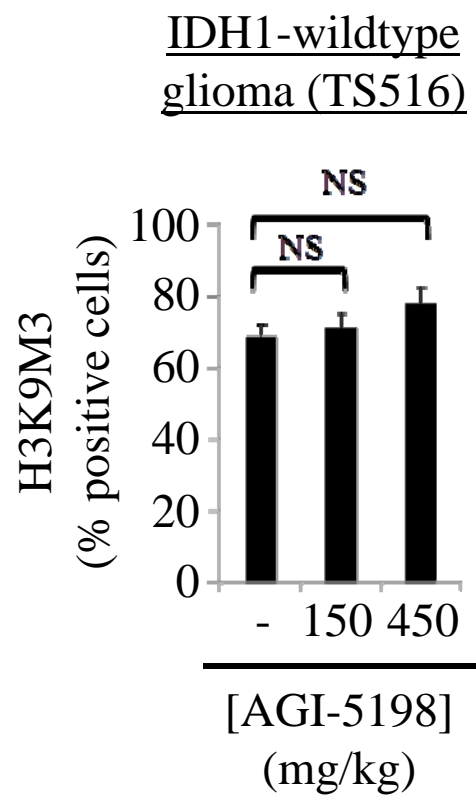

**B**

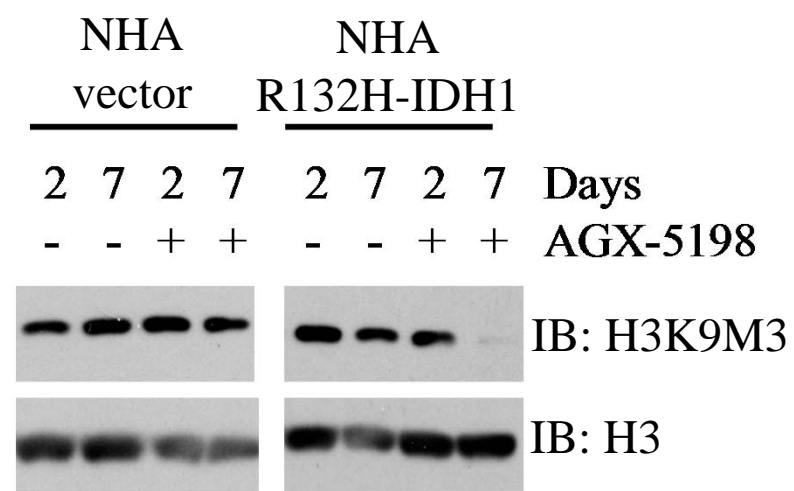

**Fig.S13**

**R132H-IDH1**  
**(TS603 glioma)**

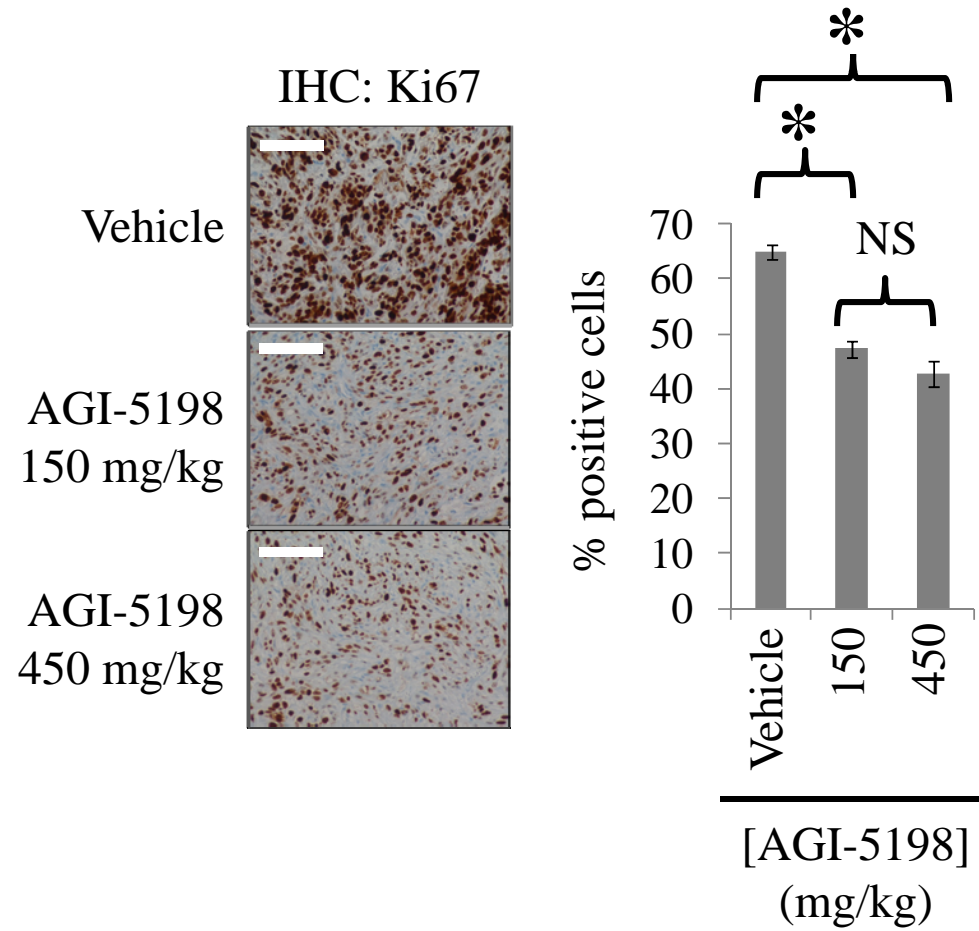

Fig.S14

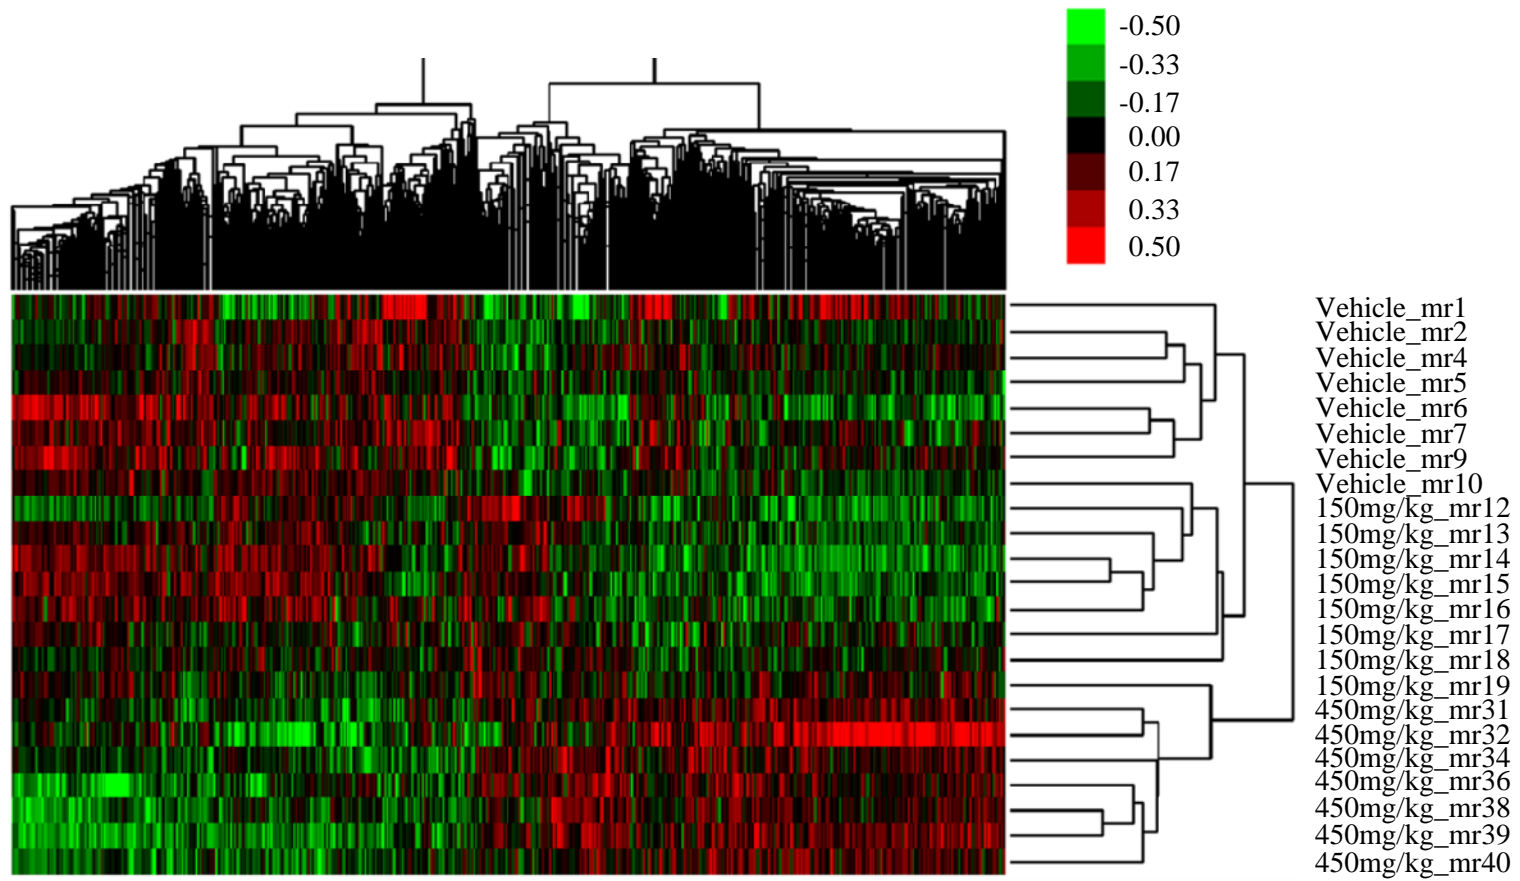

**Fig.S15**

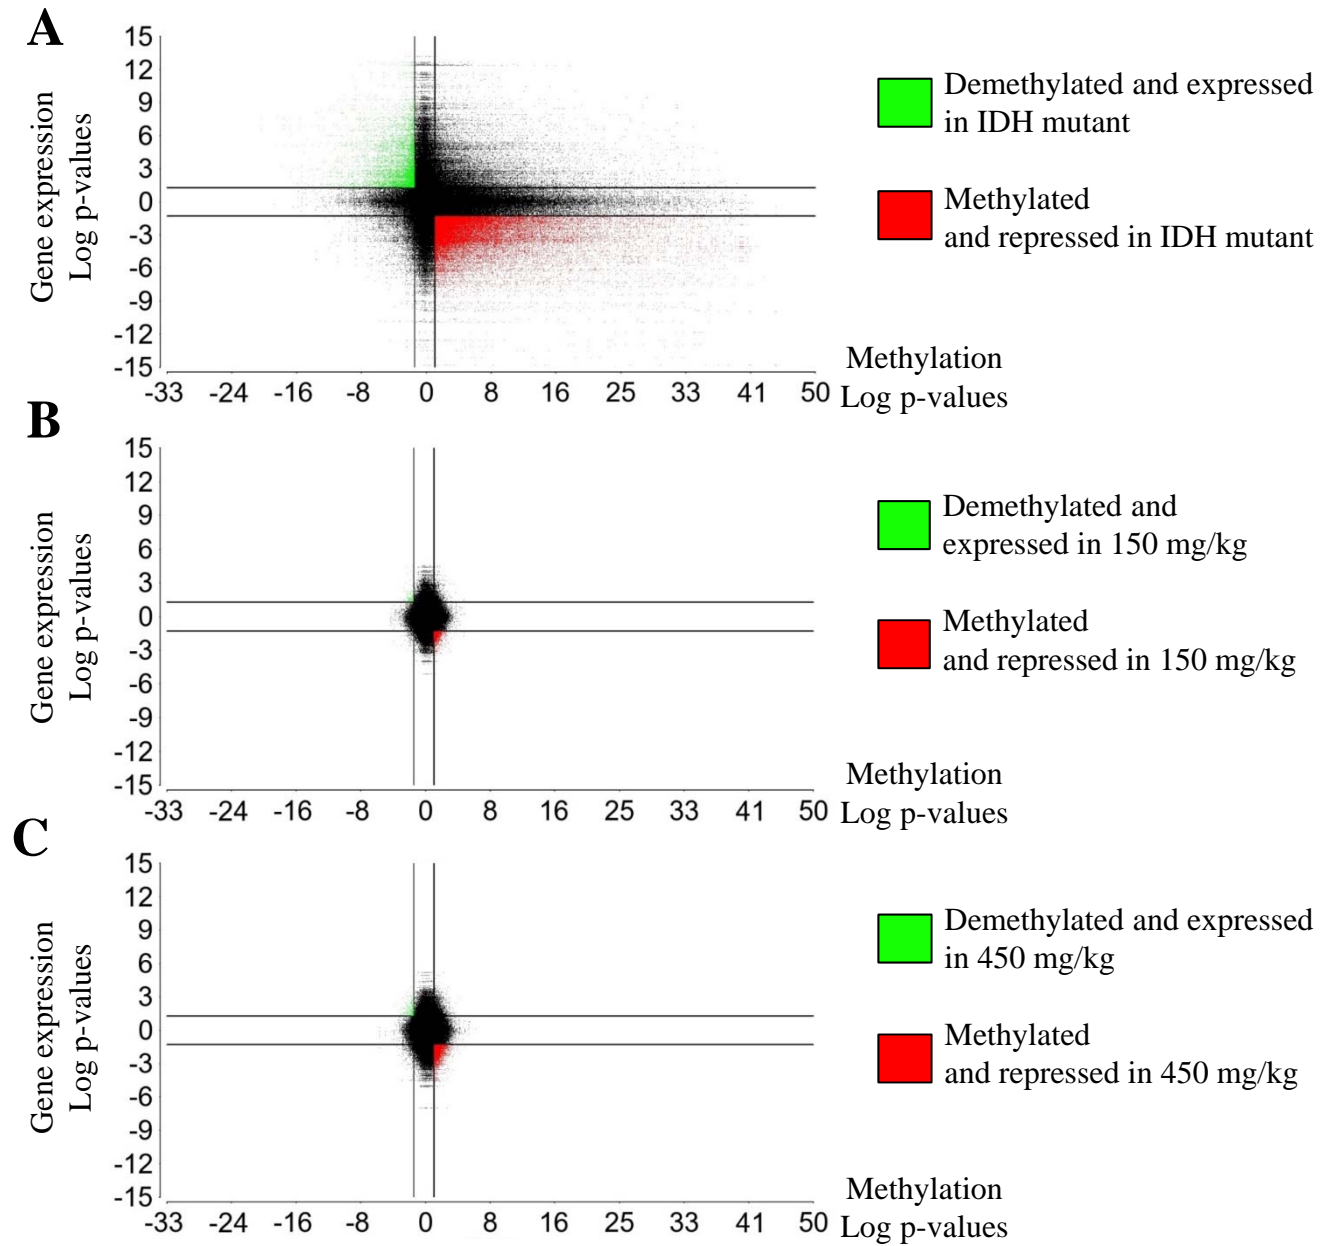

**Fig.S16**

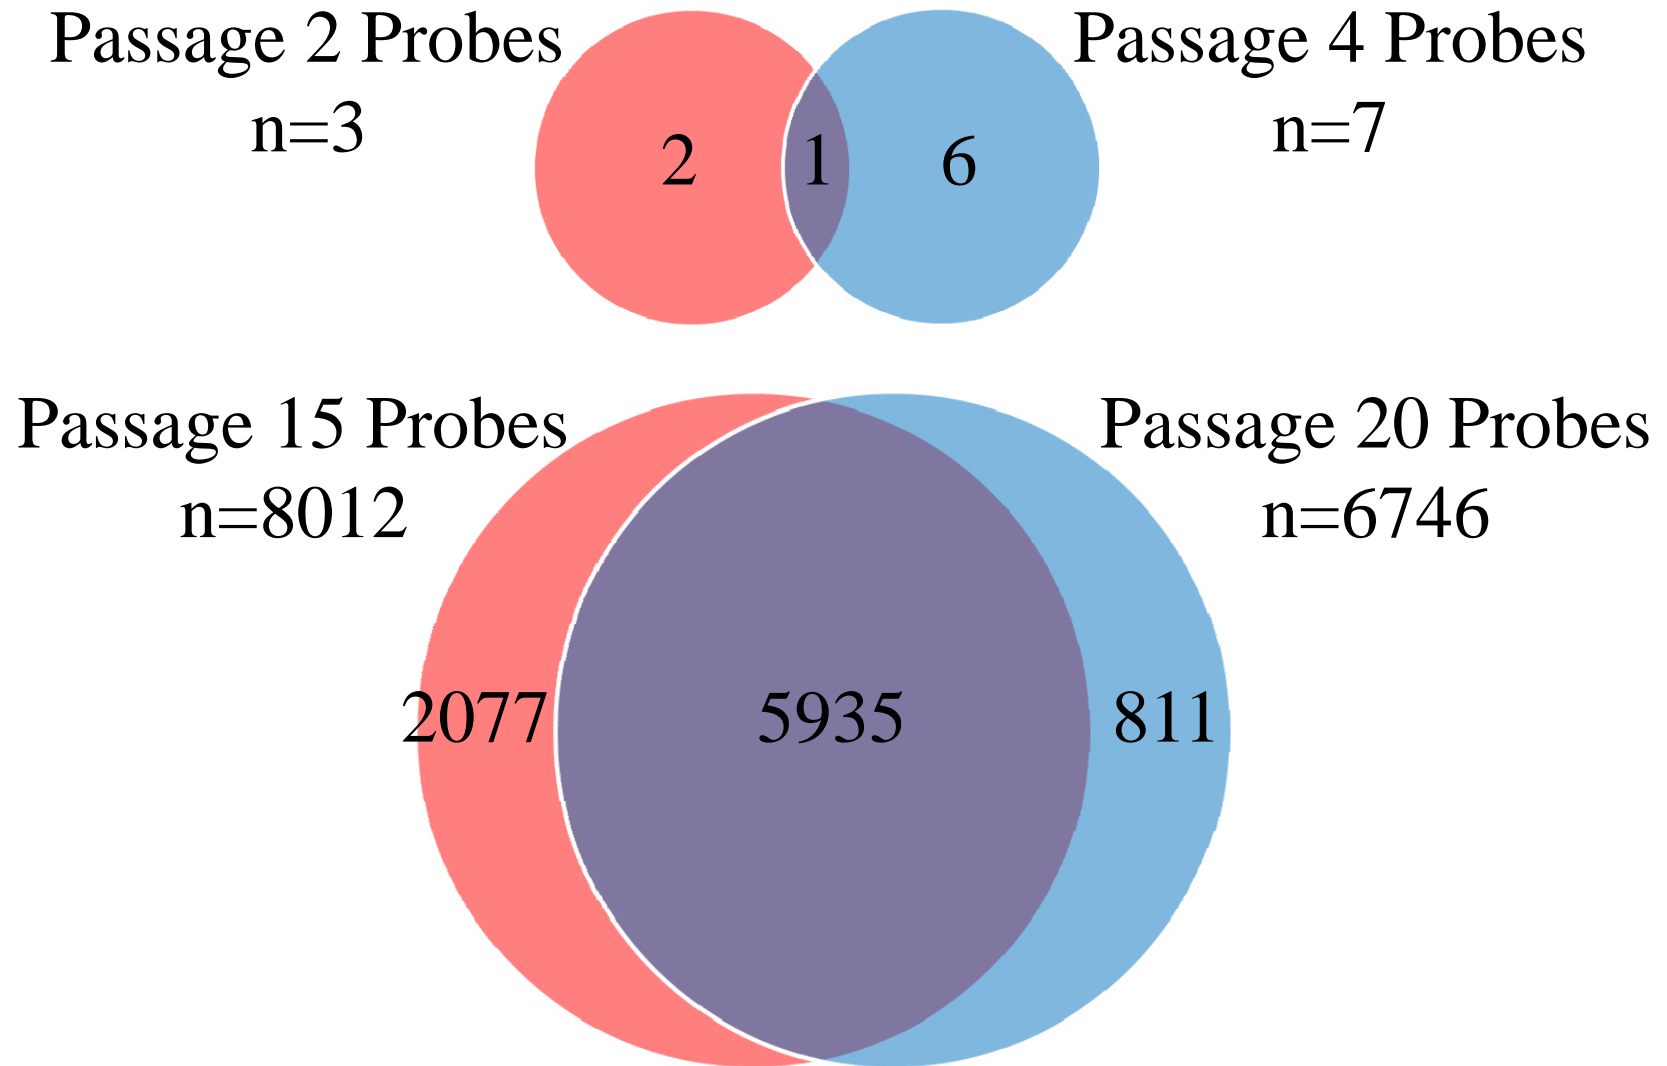

Supplement: NIHMS504357-supplement-2.pdf [file NIHMS504357-supplement-2.pdf]
